# Supplementary material
Source: ML conference proceedings conference paper supplement (https://proceedings.neurips.cc/paper_files/paper/2014/hash/e8dfff4676a47048d6f0c4ef899593dd-Abstract.html)
Supplement: Supplementary file 2 [file e8dfff4676a47048d6f0c4ef899593dd-Supplemental.zip]

Archive with 1 entries (1 files):
- SuppNeuralPopsNips.pdf
